# Supplementary material
Source: PubMed Central journal article supplement (PMC4019172)
Supplement: IAI.01518-13_zii999090721so1.pdf [file IAI.01518-13_zii999090721so1.pdf]

**Figure S1**

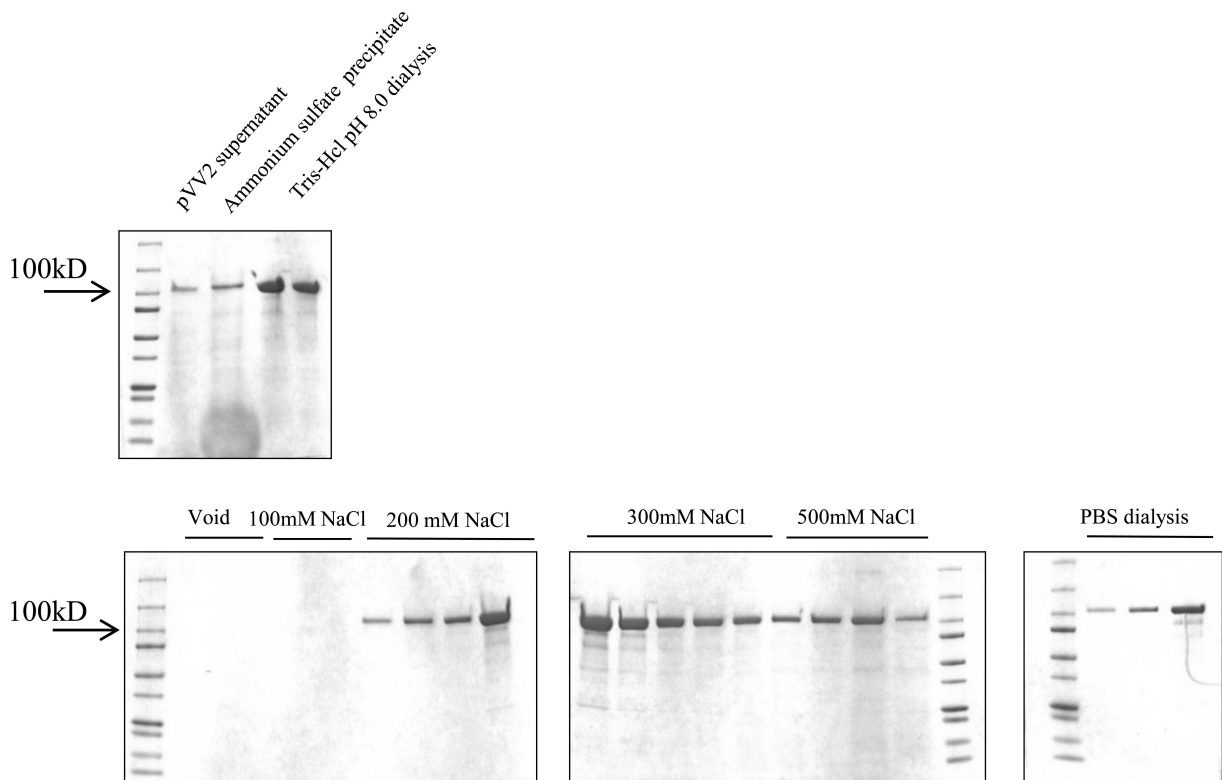

**Steps in Crcl purification.** Supernatants from T7 Express lysY/Iq pVV2 strains were centrifuged and filtered to remove residual bacteria. 50% ammonium sulfate was added with stirring to precipitate all proteins. Precipitate was centrifuged and dialyzed with Tris HCl pH 8.0 overnight in a 50 kDa cut off dialysis membrane. Dialysed concentrate was passed through a QA fast flow sepharose anion exchange column to capture Crcl. Crcl was eluted using varying concentrations of sodium chloride. The fraction with maximum protein yield was further dialyzed in PBS and protein concentration was determined. Appropriate concentrations of purified Crcl was used in subsequent *in vitro* experiments.
